# Supplementary material
Source: Springer Nature journal article supplement (https://www.springermedizin.de/resource/supplementary/12936_2011_1889_MOESM5_ESM.pdf/9542006)
Supplement: MOESM5 [file 9542006]

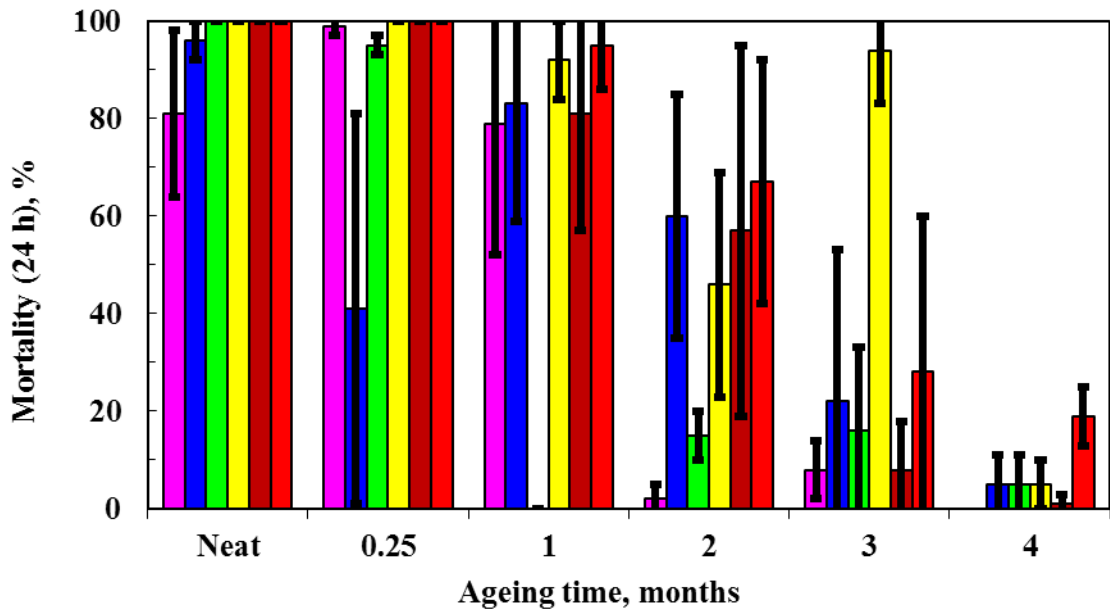

DDT

Alphacypermethrin+phosphogypsum

Bendiocarb+phosphogypsum+binder

Bendiocarb+phosphogypsum

Bendiocar+binder

Propoxur+binder
